# Supplementary material for: Poor Diet, Long Sleep, and Lack of Physical Activity Are Associated with Inflammation among Non-Demented Community-Dwelling Elderly
Source: MDPI journal article supplement (doi:10.3390/healthcare10010143), 2022-01-12
Supplement: s1 [file s1]

## Supplementary Material

**Supplementary Table S1.** Zero order and partial correlations of variables of interest with levels of IL-6. +  $p < 0.01$ .

| Confounders            | –       | Age,<br>Gender, BMI | Age, Gender,<br>BMI, MCI<br>Diagnosis |                          | –       | Age,<br>Gender,<br>BMI | Age, Gender,<br>BMI, MCI<br>Diagnosis |
|------------------------|---------|---------------------|---------------------------------------|--------------------------|---------|------------------------|---------------------------------------|
| Night TST              | 0.03    | 0.01                | 0.01                                  | Mediterranean Diet Score | 0.03    | 0.01                   | 0.01                                  |
| 24-h TST               | 0.04    | 0.03                | 0.02                                  | Consumption of:          |         |                        |                                       |
| Night TMB              | 0.07    | 0.04                | 0.03                                  | Vegetables               | –0.28 + | –0.33 +                | –0.36 +                               |
| 24-h TMB               | 0.08    | 0.08                | 0.06                                  | Red meat                 | –0.11   | –0.12                  | –0.12                                 |
| Night Sleep Efficiency | –0.04   | –0.04               | –0.02                                 | Dairy products           | –0.07   | –0.11                  | –0.11                                 |
| Night WASO             | 0.03    | 0.02                | 0.01                                  | Legumes                  | –0.12   | –0.12                  | –0.13                                 |
| Night Sleep latency    | 0.13    | 0.13                | 0.13                                  | Non-refined cereal       | –0.11   | –0.06                  | –0.05                                 |
| Number of Awakenings   | –0.02   | 0.01                | 0.01                                  | Refined cereal           | –0.02   | –0.04                  | –0.04                                 |
| Sleep duration         | 0.09    | 0.08                | 0.08                                  | Potatoes                 | –0.14   | –0.15                  | –0.15                                 |
| Non-refreshing sleep   | 0.04    | 0.04                | 0.05                                  | Fruit                    | –0.02   | –0.03                  | –0.02                                 |
| Leg movement           | –0.09   | –0.12               | –0.13                                 | Fish                     | –0.02   | –0.04                  | –0.04                                 |
| EDS                    | –0.06   | –0.06               | –0.07                                 | Poultry                  | 0.01    | –0.02                  | –0.03                                 |
| Sleep Apnea symptoms   | –0.04   | –0.01               | 0.01                                  | Eggs                     | –0.11   | –0.12                  | –0.12                                 |
| Insomnia symptoms      | –0.06   | –0.05               | –0.09                                 | Sweets                   | –0.09   | –0.14                  | –0.14                                 |
| Physical activity      | –0.29 + | –0.29 +             | –0.29 +                               | Alcoholic beverages      | –0.02   | –0.13                  | –0.12                                 |

|                     |       |       |       |
|---------------------|-------|-------|-------|
| Total Energy Intake | -0.06 | -0.11 | -0.10 |
|---------------------|-------|-------|-------|

---

**Supplementary Table S2.** Zero order and partial correlations of variables of interest with levels of TNF-a. \*  $p < 0.05$ .

| <b>Confounders</b>     | <b>–</b> | <b>Age,<br/>Gender,<br/>BMI</b> | <b>Age, Gender,<br/>BMI, MCI<br/>Diagnosis</b> |                          | <b>–</b> | <b>Age,<br/>Gender,<br/>BMI</b> | <b>Age, Gender, BMI,<br/>MCI Diagnosis</b> |
|------------------------|----------|---------------------------------|------------------------------------------------|--------------------------|----------|---------------------------------|--------------------------------------------|
| Night TST              | 0.07     | 0.03                            | 0.02                                           | Mediterranean Diet Score | –0.05    | –0.10                           | –0.08                                      |
| 24-h TST               | 0.04     | 0.02                            | 0.01                                           | Consumption of:          |          |                                 |                                            |
| Night TMB              | 0.10     | 0.04                            | 0.03                                           | Vegetables               | –0.21 *  | –0.19 *                         | –0.18 *                                    |
| 24-h TMB               | 0.04     | 0.02                            | 0.02                                           | Red meat                 | –0.17    | –0.12                           | –0.14                                      |
| Night Sleep Efficiency | 0.001    | 0.02                            | 0.03                                           | Dairy products           | 0.09     | 0.13                            | 0.13                                       |
| Night WASO             | 0.05     | 0.02                            | 0.01                                           | Legumes                  | –0.03    | –0.03                           | –0.04                                      |
| Night Sleep latency    | 0.09     | 0.07                            | 0.06                                           | Non-refined cereal       | 0.05     | 0.10                            | 0.13                                       |
| Number of Awakenings   | 0.06     | 0.09                            | 0.09                                           | Refined cereal           | –0.01    | –0.02                           | –0.01                                      |
| Sleep duration         | 0.06     | 0.06                            | 0.08                                           | Potatoes                 | –0.13    | –0.14                           | –0.14                                      |
| Non-refreshing sleep   | 0.002    | –0.06                           | –0.07                                          | Fruit                    | 0.01     | 0.01                            | 0.01                                       |
| Leg movement           | –0.13    | –0.14                           | –0.15                                          | Fish                     | –0.10    | –0.09                           | –0.09                                      |
| EDS                    | –0.02    | –0.04                           | –0.05                                          | Poultry                  | 0.01     | 0.07                            | 0.06                                       |
| Sleep Apnea symptoms   | –0.14    | –0.09                           | –0.10                                          | Eggs                     | 0.11     | 0.09                            | 0.13                                       |
| Insomnia symptoms      | –0.11    | –0.13                           | –0.13                                          | Sweets                   | –0.16    | –0.13                           | –0.11                                      |
| Physical activity      | –0.05    | –0.04                           | –0.05                                          | Alcoholic beverages      | 0.10     | 0.07                            | 0.09                                       |
| Total Energy Intake    | –0.04    | –0.01                           | –0.04                                          |                          |          |                                 |                                            |
